# Supplementary material for: Optimising Clinical Epidemiology in Disease Outbreaks: Analysis of ISARIC-WHO COVID-19 Case Report Form Utilisation
Source: Preprints.org preprint supplement (doi:10.20944/preprints202407.1459.v1), 2024-07-18
Supplement: Supplementary file 1 [file supplementary]

## Sheet: Table S3
Collection time	Field group	Field	Utilisation distance, all patienets (x, y)	Utilisation distance, severe patients (x, y)	Delta	Utilisation zone
Admission	Demographics	Subject ID	0 (100,100)	0 (100,100)	0
Admission	Demographics	Country	0 (100,100)	0 (100,100)	0
Admission	Demographics	Sex	1.7 (99.9,97.6)	1.7 (99.9,97.6)	0
Admission	Demographics	Age	3.2 (95.4,100)	3.2 (95.4,100)	0
Admission	Demographics	Admission date	3.7 (95.3,97.6)	3.7 (95.3,97.6)	0
Outcome	Outcome status	Outcome	5.7 (92.3,97.6)	2.0 (97.2,100)	3.7
Admission	Comorbidities	Chronic cardiac disease	8.7 (87.9,97.6)	8.1 (89.5,95.2)	0.6
Summary	Diagnostics	Patogen tested	8.7 (88.7,95.2)	9.3 (91.0,90.5)	-0.6
Admission	Comorbidities	Chronic kidney disease	8.8 (87.7,97.6)	8.0 (91.3,92.9)	0.9
Admission	Comorbidities	Asthma	9.6 (87.4,95.2)	10.1 (92.2,88.1)	-0.5
Summary	Diagnostics	Lab test result	9.7 (87.1,95.2)	10.6 (88.5,90.5)	-0.8
Admission	Comorbidities	Chronic pulmonary disease	9.7 (88.3,92.9)	10.1 (92.1,88.1)	-0.4
Admission	Comorbidities	Malignant neoplasm	9.8 (86.3,97.6)	8.2 (90.9,92.9)	1.6
Outcome	Outcome status	Outcome date	10.3 (87.3,92.9)	5.4 (94.2,95.0)	4.8
Admission	Comorbidities	Chronic neurological disorder	10.9 (86.3,92.9)	9.1 (91.4,90.5)	1.9
Admission	Demographics	Site ID	12.2 (95.6,83.3)	12.2 (95.6,83.3)	0
Admission	Comorbidities	Hypertension	12.8 (86.5,88.1)	13.5 (87.2,85.7)	-0.8
Admission	Signs & symptoms	Fever	14.0 (86.2,85.7)	13.9 (89.6,83.3)	0.1
Admission	Comorbidities	HIV	14.2 (81.3,92.9)	13.3 (85.4,88.1)	0.8
Admission	Signs & symptoms	Short of breath	14.5 (88.0,83.3)	14.6 (92.1,81.0)	-0.1
Admission	Demographics	Pregnancy	15.0 (90.6,81.0)	15.0 (90.6,81.0)	0
Admission	Signs & symptoms	Diarrhoea	15.5 (83.5,85.7)	15.5 (85.8,83.3)	0
Admission	Signs & symptoms	Headache	16.3 (82.0,85.7)	16.5 (83.6,83.3)	-0.3
Admission	Signs & symptoms	Malaise	16.9 (82.8,83.3)	17.1 (85.2,81.0)	-0.1
Admission	Signs & symptoms	Vomiting	16.9 (82.9,83.3)	17.0 (85.3,81.0)	-0.1
Admission	Signs & symptoms	Muscle/joint pain	18.4 (80.0,83.3)	18.6 (81.9,81.0)	-0.2
Admission	Comorbidities	Malnutrition	18.6 (84.6,78.6)	18.8 (88.0,76.2)	-0.2
Admission	Demographics	Inclusion criteria	18.6 (98.5,73.8)	18.6 (98.5,73.8)	0
Admission	Signs & symptoms	Seizures	18.7 (81.6,81.0)	19.0 (83.8,78.6)	-0.3
Admission	Signs & symptoms	Chest pain	18.8 (81.5,81.0)	18.8 (84.2,78.6)	0
Admission	Signs & symptoms	Cough	18.9 (87.8,76.2)	19.4 (91.6,73.8)	-0.5
Admission	Signs & symptoms	Abdominal pain	19.2 (80.6,81.0)	19.4 (82.8,78.6)	-0.2
Admission	Signs & symptoms	Skin rash	19.5 (82.6,78.6)	20.1 (84.5,76.2)	-0.5
Admission	Comorbidities	Chronic haematological disease	19.5 (86.0,76.2)	20.0 (89.4,73.8)	-0.5
Admission	Comorbidities	Dementia	19.5 (86.1,76.2)	19.9 (89.5,73.8)	-0.5
Admission	Signs & symptoms	Confusion	19.8 (82.0,78.6)	18.5 (84.9,78.6)	1.3
Outcome	Outcome health	Self-care ability	20.9 (75.6,83.3)	19.5 (76.9,85.0)	1.4
Admission	Signs & symptoms	Runny nose	21.3 (78.9,78.6)	21.6 (80.9,76.2)	-0.3
Admission	Comorbidities	Rheumatological disorder	21.3 (85.2,73.8)	22.8 (90.8,69.0)	-1.6
Admission	Signs & symptoms	Conjunctivitis	21.5 (78.4,78.6)	20.2 (81.1,78.6)	1.3
Admission	Signs & symptoms	Sore throat	21.5 (81.0,76.2)	22.5 (82.0,73.8)	-0.9
Admission	Vital signs	Temperature	22.1 (77.3,78.6)	20.2 (81.2,78.6)	1.9
Admission	Vital signs	Temperature units	22.1 (77.3,78.6)	20.2 (81.2,78.6)	1.9
Summary	Diagnostics	Coronavirus test	22.8 (85.2,71.4)	26.1 (90.8,64.3)	-3.3
Admission	Vital signs	Systolic BP	23.0 (75.4,78.6)	20.1 (84.6,76.2)	3
Admission	Vital signs	Diastolic BP	23.1 (75.4,78.6)	20.1 (84.5,76.2)	3
Admission	Comorbidities	Smoking	23.9 (69.3,85.7)	25.3 (71.3,78.6)	-1.4
Admission	Signs & symptoms	Cough-productive	24.2 (85.2,69.0)	24.9 (88.5,66.7)	-0.7
Admission	Vital signs	O2 saturation	25.6 (81.3,69.0)	23.5 (88.0,69.0)	2.1
Admission	Signs & symptoms	Cough-haemoptysis	25.6 (85.9,66.7)	26.7 (87.8,64.3)	-1.1
Summary	Interventions	ICU admission	26.0 (80.2,69.0)	19.7 (95.9,72.5)	6.3
Admission	Vital signs	Heart rate	26.0 (80.2,69.0)	24.0 (86.1,69.0)	2
Admission	Comorbidities	Obesity	26.4 (83.2,66.7)	28.0 (89.1,61.9)	-1.6
Admission	Signs & symptoms	Bleeding location	26.9 (100,61.9)	33.7 (100,52.4)	-6.7
Admission	Comorbidities	Tuberculosis	27.0 (77.5,69.0)	27.8 (83.7,64.3)	-0.7
Admission	Demographics	Health worker	27.8 (83.7,64.3)	27.8 (83.7,64.3)	0
Admission	Vital signs	Respiratory rate	27.9 (66.8,78.6)	23.8 (74.1,78.6)	4.1
Admission	Signs & symptoms	Wheezing	27.9 (78.8,66.7)	26.9 (81.7,66.7)	1.1
Admission	Signs & symptoms	Bleeding	27.9 (79.0,66.7)	26.7 (82.3,66.7)	1.2
Admission	Demographics	Lab worker	28.5 (81.3,64.3)	28.5 (81.3,64.3)	0
Admission	Signs & symptoms	Lymphadenopathy	28.6 (77.1,66.7)	28.2 (82.4,64.3)	0.4
Summary	Complications	Cardiac arrest	28.9 (70.8,71.4)	23.1 (84.0,71.4)	5.8
Admission	Vital signs	O2 sat air source	29.8 (74.3,66.7)	26.7 (82.4,66.7)	3.1
Summary	Interventions	ICU admission date	30.1 (86.7,59.5)	28.1 (86.7,62.5)	2
Summary	Complications	ARDS	30.3 (68.0,71.4)	24.0 (81.6,71.4)	6.3
Admission	Demographics	First symptom date	30.3 (86.1,59.5)	30.3 (86.1,59.5)	0
Summary	Complications	Acute kidney injury	31.3 (73.9,64.3)	26.7 (87.8,64.3)	4.6
Admission	Signs & symptoms	Loss of smell	32.1 (69.2,66.7)	33.2 (72.6,61.9)	-1.1
Summary	Complications	Anaemia	32.3 (68.8,66.7)	27.2 (85.7,64.3)	5.1
Admission	Comorbidities	Liver disease-moderate/severe	32.3 (84.1,57.1)	32.5 (91.8,54.8)	-0.2
Admission	Comorbidities	Lliver disease-mild	32.3 (84.3,57.1)	32.5 (92.0,54.8)	-0.2
Summary	Complications	Bacteraemia	32.4 (71.4,64.3)	27.3 (85.3,64.3)	5
Summary	Complications	Seizures	32.5 (71.0,64.3)	27.1 (86.0,64.3)	5.4
Summary	Complications	Meningitis/encephalitis	32.5 (71.0,64.3)	27.3 (85.5,64.3)	5.3
Summary	Complications	Pancreatitis	32.5 (71.0,64.3)	27.3 (85.5,64.3)	5.2
Summary	Interventions	Non-invasive ventilation	32.5 (78.2,59.5)	30.8 (83.9,59.5)	1.7
Admission	Comorbidities	Diabetes-type unspecified	32.6 (68.2,66.7)	33.1 (69.7,64.3)	-0.5
Summary	Complications	Liver dysfunction	32.6 (70.8,64.3)	27.3 (85.3,64.3)	5.3
Admission	Demographics	Gestational age	32.8 (89.7,54.8)	32.8 (89.7,54.8)	0
Summary	Complications	Cardiac arrhythmia	32.9 (67.6,66.7)	26.9 (81.5,66.7)	5.9
Summary	Interventions	RRT/dialysis	33.3 (80.6,57.1)	31.8 (86.3,57.1)	1.5
Summary	Interventions	O2 therapy	33.6 (79.3,57.1)	31.8 (86.3,57.1)	1.8
Summary	Complications	Bronchiolitis	33.9 (68.0,64.3)	28.3 (82.0,64.3)	5.7
Summary	Interventions	Invasive ventillation	34.2 (83.1,54.8)	32.7 (90.1,54.8)	1.4
Summary	Interventions	Inotropes	35.0 (80.1,54.8)	33.5 (86.1,54.8)	1.5
Summary	Interventions	ICU duration	35.1 (79.4,54.8)	33.4 (79.4,57.5)	1.8
Summary	Interventions	ICU discharge date	35.1 (79.6,54.8)	33.3 (79.6,57.5)	1.8
Daily	Interventions	ICU admission	35.4 (78.4,54.8)	30.9 (89.6,57.5)	4.5
Daily	Vitals & assessments	Diastolic BP	36.1 (72.3,57.1)	32.2 (84.6,57.1)	3.9
Daily	Vitals & assessments	Systolic BP	36.1 (72.4,57.1)	32.2 (84.6,57.1)	3.9
Admission	Signs & symptoms	Indrawing chest	36.7 (74.7,54.8)	36.0 (76.7,54.8)	0.7
Summary	Complications	Bacterial pneumonia	36.9 (70.3,57.1)	33.1 (81.1,57.1)	3.7
Admission	Vital signs	Weight	37.2 (59.2,66.7)	37.4 (63.4,61.9)	-0.1
Summary	Complications	Stroke	37.6 (68.4,57.1)	32.8 (82.2,57.1)	4.8
Summary	Complications	Pneumothorax	37.6 (68.5,57.1)	33.0 (81.5,57.1)	4.6
Admission	Comorbidities	Diabetes-type specified	38.0 (62.0,61.9)	37.8 (65.2,59.5)	0.3
Summary	Complications	Hyperglycaemia	38.3 (66.8,57.1)	33.1 (81.2,57.1)	5.3
Admission	Demographics	Ethnicity	38.4 (74.0,52.4)	38.4 (74.0,52.4)	0
Summary	Interventions	Prone position	38.6 (73.2,52.4)	36.9 (78.6,52.4)	1.7
Summary	Complications	Viral pneumonia	38.7 (69.2,54.8)	34.6 (81.5,54.8)	4.1
Admission	Lab tests	Platelets	38.8 (58.3,64.3)	34.9 (68.7,61.9)	4
Summary	Complications	Hypoglycaemia	38.8 (65.7,57.1)	33.7 (79.1,57.1)	5.1
Summary	Interventions	ECLS/ECMO	39.4 (81.0,47.6)	38.2 (86.8,47.6)	1.2
Admission	Lab tests	White blood cells	39.6 (56.9,64.3)	35.5 (67.4,61.9)	4.1
Admission	Signs & symptoms	Loss of taste	39.6 (66.9,54.8)	40.6 (67.9,52.4)	-1
Summary	Complications	Pleural effusion	39.6 (67.1,54.8)	35.7 (83.4,52.4)	3.9
Admission	Lab tests	Hemoglobin	39.9 (58.4,61.9)	35.8 (66.7,61.9)	4.1
Summary	Complications	Congestive heart failure	39.9 (69.8,52.4)	35.6 (83.5,52.4)	4.2
Summary	Complications	Rhabdomyolysis	39.9 (69.8,52.4)	35.6 (83.5,52.4)	4.2
Summary	Complications	Cardiac ischaemia	40.0 (69.5,52.4)	35.7 (83.1,52.4)	4.2
Admission	Lab tests	Creatinine	40.2 (57.7,61.9)	36.0 (66.2,61.9)	4.2
Summary	Complications	Gastrointestinal bleeding	40.2 (69.0,52.4)	35.8 (82.8,52.4)	4.4
Daily	Vitals & assessments	Temperature	40.3 (72.6,50.0)	37.1 (84.3,50.0)	3.2
Daily	Vitals & assessments	Temperature units	40.3 (72.6,50.0)	37.1 (84.3,50.0)	3.2
Admission	Comorbidities	Asplenia	41.1 (80.7,45.2)	40.5 (83.0,45.2)	0.5
Daily	Vitals & assessments	O2 saturation	42.3 (71.2,47.6)	38.7 (84.1,47.6)	3.6
Daily	Vitals & assessments	HCO3	42.3 (94.2,40.5)	42.3 (94.2,40.5)	0
Daily	Vitals & assessments	Heart rate	42.6 (74.9,45.2)	39.8 (86.8,45.2)	2.8
Summary	Complications	Endocarditis	43.3 (72.6,45.2)	41.5 (86.4,42.9)	1.8
Summary	Diagnostics	Lab test date	43.6 (64.0,50.0)	42.7 (66.1,50.0)	0.8
Summary	Complications	Cryptogenic organizing pneumonia	43.6 (67.4,47.6)	39.9 (78.9,47.6)	3.7
Admission	Vital signs	Height	43.8 (55.3,57.1)	43.9 (57.5,54.8)	-0.1
Daily	Vitals & assessments	pH	43.8 (96.9,38.1)	43.8 (96.5,38.1)	0
Daily	Vitals & assessments	Respiratory rate	43.9 (63.2,50.0)	38.3 (79.0,50.0)	5.6
Daily	Vitals & assessments	PCO2	43.9 (94.9,38.1)	43.9 (94.7,38.1)	0
Admission	Lab tests	Sodium	44.3 (52.1,59.5)	39.8 (63.5,57.1)	4.5
Admission	Pre-admission medication	Preadmission medication agent	44.6 (79.1,40.5)	46.1 (88.8,35.7)	-1.5
Summary	Complications	Coagulation disorder	44.9 (67.7,45.2)	40.7 (82.5,45.2)	4.3
Daily	Interventions	Invasive ventillation	44.9 (67.8,45.2)	39.7 (87.3,45.2)	5.2
Daily	Interventions	Non-invasive ventilation	45.0 (67.7,45.2)	40.0 (85.6,45.2)	4.9
Summary	Complications	Cardiomyopathy	45.1 (71.8,42.9)	42.9 (79.4,42.9)	2.1
Daily	Vitals & assessments	Base excess	45.1 (77.0,40.5)	45.1 (77.1,40.5)	0
Daily	Interventions	RRT/dialysis	45.9 (61.6,47.6)	39.4 (81.1,47.6)	6.5
Admission	Lab tests	CRP	46.2 (47.0,61.9)	41.9 (56.6,59.5)	4.2
Admission	Lab tests	Potassium	46.3 (50.5,57.1)	41.6 (62.4,54.8)	4.7
Daily	Interventions	High flow nasal cannula	46.3 (67.9,42.9)	41.8 (84.8,42.9)	4.5
Summary	Diagnostics	Lab test method	46.4 (64.0,45.2)	45.2 (76.6,40.5)	1.1
Daily	Lab tests	Platelets	46.5 (54.6,52.4)	39.6 (70.5,52.4)	6.9
Summary	Diagnostics	Specimen type	46.5 (60.2,47.6)	44.5 (68.9,45.2)	2
Daily	Lab tests	White blood cells	46.6 (54.4,52.4)	40.0 (69.5,52.4)	6.6
Admission	Signs & symptoms	Inability to walk	46.8 (66.7,42.9)	46.8 (71.1,40.5)	0
Daily	Interventions	Prone position	46.9 (59.4,47.6)	40.4 (77.1,47.6)	6.4
Daily	Interventions	Vasopressor/inotrope	47.1 (100,33.3)	47.1 (100,33.3)	0
Admission	Lab tests	Haematocrit	47.1 (49.0,57.1)	42.2 (58.4,57.1)	4.9
Daily	Lab tests	Hemoglobin	47.1 (53.5,52.4)	40.3 (68.6,52.4)	6.7
Admission	Signs & symptoms	Other symptom	47.1 (70.0,40.5)	48.5 (70.4,38.1)	-1.4
Daily	Lab tests	Creatinine	47.2 (53.2,52.4)	40.1 (69.1,52.4)	7.1
Daily	Vitals & assessments	AVPU	48.4 (66.2,40.5)	44.5 (79.4,40.5)	3.9
Admission	Lab tests	ALT	48.5 (44.7,59.5)	43.9 (52.9,59.5)	4.5
Daily	Interventions	Nitric oxide	48.5 (62.0,42.9)	43.4 (77.5,42.9)	5.1
Daily	Interventions	Neuromuscular blocking agents	48.6 (65.6,40.5)	44.1 (81.6,40.5)	4.5
Daily	Interventions	ECLS/ECMO	48.7 (75.2,35.7)	45.7 (93.4,35.7)	3
Daily	Lab tests	Potassium	48.8 (52.5,50.0)	42.4 (67.0,50.0)	6.4
Admission	Lab tests	Total bilirubin	50.0 (42.0,59.5)	45.0 (50.9,59.5)	5
Admission	Pre-admission medication	Preadmission medication type	50.0 (61.9,40.5)	46.9 (70.8,40.5)	3.1
Daily	Lab tests	Sodium	50.2 (52.0,47.6)	43.5 (67.8,47.6)	6.7
Summary	Interventions	Nitric oxide	50.2 (65.1,38.1)	48.1 (71.7,38.1)	2.1
Daily	Lab tests	Haematocrit	50.6 (51.3,47.6)	44.0 (66.3,47.6)	6.5
Daily	Interventions	Tracheostomy	50.8 (63.6,38.1)	47.2 (75.2,38.1)	3.6
Daily	Lab tests	CRP	51.6 (46.8,50.0)	45.2 (60.3,50.0)	6.5
Daily	Vitals & assessments	Glasgow	51.9 (48.5,47.6)	45.2 (63.5,47.6)	6.8
Daily	Lab tests	ALT	52.1 (45.9,50.0)	45.8 (58.8,50.0)	6.3
Daily	Lab tests	Urea	52.1 (48.1,47.6)	44.0 (66.4,47.6)	8.1
Summary	Complications	Myocarditis/pericarditis	52.2 (63.7,35.7)	48.6 (75.7,35.7)	3.6
Summary	Complications	Pulmonary embolism	52.4 (67.6,33.3)	50.2 (75.4,33.3)	2.2
Summary	Interventions	O2 therapy duration	52.7 (52.2,42.9)	48.0 (63.3,42.9)	4.7
Admission	Lab tests	Urea	52.9 (42.4,52.4)	47.8 (57.3,47.6)	5.1
Daily	Interventions	Other intervention	53.0 (65.6,33.3)	49.7 (77.6,33.3)	3.3
Daily	Lab tests	Total bilirubin	53.4 (43.4,50.0)	45.4 (59.8,50.0)	8
Admission	Lab tests	AST	53.7 (39.0,54.8)	50.4 (44.9,54.8)	3.3
Daily	Lab tests	AST	53.7 (45.0,47.6)	48.3 (56.2,47.6)	5.4
Admission	Lab tests	Lymphocyte count	53.8 (47.1,45.2)	51.6 (51.7,45.2)	2.2
Admission	Signs & symptoms	Anorexia	54.3 (61.8,33.3)	53.3 (64.9,33.3)	1.1
Admission	Vital signs	Sternal Capillary refill time	55.7 (37.3,52.4)	53.9 (42.5,50.0)	1.8
Summary	Complications	Myocardial infarction	56.0 (71.5,26.2)	54.0 (80.4,26.2)	2
Admission	Lab tests	Glucose	56.3 (42.2,45.2)	52.2 (50.6,45.2)	4.1
Admission	Lab tests	Neutrophil	56.7 (43.6,42.9)	54.4 (48.6,42.9)	2.4
Daily	Lab tests	Glucose	56.8 (46.0,40.5)	51.5 (58.0,40.5)	5.3
Summary	Diagnostics	Influenza test	56.9 (48.5,38.1)	55.3 (55.5,35.7)	1.6
Daily	Vitals & assessments	Mean arterial BP	57.2 (42.8,42.9)	51.3 (55.4,42.9)	5.9
Admission	Lab tests	INR	58.5 (30.8,54.8)	54.6 (39.2,52.4)	3.8
Daily	Lab tests	Lymphocyte count	59.6 (42.9,38.1)	54.8 (53.3,38.1)	4.7
Daily	Lab tests	LDH	59.7 (37.8,42.9)	54.5 (48.3,42.9)	5.2
Daily	Lab tests	Neutrophil	59.7 (42.5,38.1)	54.9 (53.0,38.1)	4.8
Daily	Lab tests	INR	60.2 (31.1,50.0)	53.2 (48.4,45.2)	7
Admission	Lab tests	Lactate	60.4 (30.7,50.0)	55.4 (41.7,47.6)	5
Daily	Vitals & assessments	PaO2 units	61.4 (36.7,40.5)	52.4 (55.8,40.5)	9
Daily	Vitals & assessments	PaO2	61.4 (36.8,40.5)	52.4 (55.9,40.5)	9
Summary	Diagnostics	Bacteria test	61.5 (47.1,31.0)	59.2 (52.7,31.0)	2.3
Daily	Lab tests	Ferritin	61.9 (33.7,42.9)	57.2 (42.7,42.9)	4.7
Admission	Lab tests	LDH	62.1 (31.3,45.2)	59.0 (37.1,45.2)	3.2
Admission	Lab tests	APTT	62.9 (28.1,47.6)	58.6 (35.8,47.6)	4.3
Daily	Lab tests	Lactate	63.7 (28.5,45.2)	55.0 (44.8,45.2)	8.7
Admission	Comorbidities	Other comorbidities	63.8 (16.2,66.7)	61.3 (23.4,59.5)	2.5
Daily	Lab tests	D-dimer	63.9 (32.0,40.5)	57.1 (45.5,40.5)	6.8
Summary	Interventions	Invasive ventillation duration	64.0 (24.5,50.0)	55.3 (39.9,50.0)	8.8
Daily	Lab tests	Creatine kinase	64.0 (29.7,42.9)	58.4 (40.4,42.9)	5.6
Summary	Diagnostics	RSV	64.6 (40.3,31.0)	62.5 (48.0,28.6)	2.1
Admission	Lab tests	D-dimer	64.7 (24.9,47.6)	61.2 (31.1,47.6)	3.5
Daily	Vitals & assessments	PaO2 sample type	64.9 (34.4,35.7)	56.0 (53.6,35.7)	8.9
Daily	Interventions	Dopamine	64.9 (34.5,35.7)	45.5 (97.1,35.7)	19.4
Summary	Diagnostics	Adenovirus	65.0 (39.4,31.0)	63.2 (43.3,31.0)	1.8
Admission	Lab tests	PT	65.1 (26.0,45.2)	60.5 (34.2,45.2)	4.6
Daily	Lab tests	Procalcitonin	65.4 (25.4,45.2)	57.1 (40.7,45.2)	8.3
Summary	Interventions	Tracheostomy	65.6 (79.2,9.5)	64.8 (85.2,9.5)	0.8
Daily	Lab tests	APTT	65.7 (28.6,40.5)	58.4 (42.8,40.5)	7.3
Admission	Lab tests	Procalcitonin	66.7 (18.6,52.4)	61.8 (26.7,52.4)	4.8
Daily	Vitals & assessments	Sternal Capillary refill time	67.2 (34.6,31.0)	62.5 (51.5,26.2)	4.8
Summary	Interventions	Medication type	67.3 (70.4,9.5)	66.8 (73.0,9.5)	0.6
Summary	Interventions	High flow nasal cannula	68.1 (47.8,19.0)	66.8 (51.4,19.0)	1.3
Admission	Lab tests	Creatine kinase	68.3 (20.4,45.2)	65.0 (26.1,45.2)	3.3
Summary	Diagnostics	Other pathogen test	68.4 (73.0,7.1)	67.8 (76.1,7.1)	0.6
Admission	Lab tests	Ferritin	68.8 (16.5,50.0)	65.1 (22.7,50.0)	3.7
Summary	Interventions	Medication route	68.8 (80.1,4.8)	68.7 (80.8,4.8)	0.1
Daily	Vitals & assessments	FiO2	69.0 (100,2.4)	69.0 (100,2.4)	0
Summary	Interventions	Medication start date	69.1 (97.1,2.4)	69.0 (100,2.4)	0
Summary	Complications	Other complication	69.4 (12.8,54.8)	62.6 (26.9,50.0)	6.8
Summary	Complications	Deep vein thrombosis	69.5 (47.9,16.7)	68.5 (50.6,16.7)	1
Daily	Vitals & assessments	Supplemental Oxygen	70.6 (70.0,4.8)	67.3 (99.8,4.8)	3.3
Daily	Lab tests	PT	70.7 (21.4,38.1)	63.3 (35.4,38.1)	7.5
Daily	Lab tests	Troponin	73.4 (18.4,35.7)	67.8 (28.8,35.7)	5.6
Daily	Vitals & assessments	RASS	73.9 (21.5,31.0)	66.8 (38.1,28.6)	7.1
Summary	Interventions	Non-invasive vent duration	74.3 (10.3,45.2)	63.7 (28.5,45.2)	10.6
Summary	Interventions	Medication agent	74.4 (50.5,7.1)	75.8 (50.8,4.8)	-1.4
Daily	Lab tests	Fibrinogen	74.5 (32.5,19.0)	70.7 (41.3,19.0)	3.8
Summary	Diagnostics	Bacteria type	74.6 (27.0,23.8)	71.9 (32.6,23.8)	2.7
Admission	Lab tests	Troponin	76.3 (15.1,33.3)	74.3 (18.7,33.3)	2
Daily	Lab tests	Interleukin-6	77.6 (11.1,35.7)	74.4 (16.7,35.7)	3.2
Admission	Signs & symptoms	Cough-non-productive	78.3 (39.5,7.1)	68.6 (81.2,4.8)	9.7
Summary	Interventions	Medication duration	78.3 (43.4,4.8)	75.3 (52.2,4.8)	3
Daily	Interventions	Noninvasive ventilation type	83.0 (6.9,28.6)	62.6 (47.7,28.6)	20.3
Admission	Lab tests	Interleukin-6	78.9 (7.1,38.1)	77.7 (9.3,38.1)	1.3
Admission	Lab tests	Fibrinogen	79.1 (18.1,23.8)	76.7 (22.9,23.8)	2.5
Summary	Interventions	High flow nasal cannula duration	81.1 (26.6,11.9)	71.5 (50.3,11.9)	9.5
Summary	Complications	Thromboembolism	82.6 (26.1,9.5)	81.3 (29.0,9.5)	1.3
Summary	Diagnostics	Influenza type	83.7 (13.7,19.0)	84.0 (15.3,16.7)	-0.3
Summary	Diagnostics	Other pathogen type	87.4 (18.4,7.1)	86.0 (21.5,7.1)	1.4
Summary	Interventions	ECLS/ECMO duration	89.7 (2.4,19.0)	89.1 (3.4,19.0)	0.6
Daily	Interventions	ECLS/ECMO type	90.9 (2.1,16.7)	60.9 (78.2,16.7)	30
Outcome	Outcome health	Ongoing non-COVID care	98.1 (1.4,2.4)	98.4 (0.8,2.5)	-0.3
Outcome	Outcome health	Delayed discharge	98.2 (1.2,2.4)	98.6 (0.4,2.5)	-0.4
Outcome	Outcome health	Ongoing COVID care	98.2 (1.3,2.4)	96.8 (3.9,2.5)	1.4
Summary	Interventions	O2 therapy dose	98.7 (0.2,2.4)	100 (0,0)	-1.3
