# Supplementary material for: Optimising Clinical Epidemiology in Disease Outbreaks: Analysis of ISARIC-WHO COVID-19 Case Report Form Utilisation
Source: Preprints.org preprint supplement (doi:10.20944/preprints202407.1459.v1), 2024-07-18
Supplement: Supplementary file 1 [file supplementary]

## COVID-19 CORE CASE REPORT FORM

## ACUTE RESPIRATORY INFECTION CLINICAL CHARACTERISATION DATA TOOL

**DESIGN OF THIS CASE REPORT FORM (CRF)**

This CRF is set up in modules to be used for recording data on the ISARIC COVID-19 Core Database or for independent studies.

**Module 1 and Module 2** complete on the first day of presentation/admission or on first day of COVID-19 assessment.

**Module 2** also complete on first day of admission to ICU or high dependency unit, or if receiving critical care in any ward, and on any days that research specific samples are taken. In addition, complete daily if of interest for local, specific analysis. Continue to follow-up patients who transfer between wards.

**Module 3** (Outcome) complete at discharge or death

**GENERAL GUIDANCE**

- The CRF is designed to collect data obtained through examination, interview and review of hospital notes. Data may be collected prospectively or retrospectively if the patient is enrolled after the admission date.
- For more detailed guidance on how to complete these forms, please refer to the CRF Completion Guideline
- Participant Identification Numbers consist of a 3 or 5 digit site code and a 4 digit participant number. You can obtain a site code and register on the data management system by contacting [ncov@isaric.org](mailto:ncov@isaric.org). Participant numbers should be assigned sequentially for each site beginning with 0001. In the case of a single site recruiting participants on different wards, or where it is otherwise difficult to assign sequential numbers, it is acceptable to assign numbers in blocks or incorporate alpha characters. E.g. Ward X will assign numbers from 0001 or A001 onwards and Ward Y will assign numbers from 5001 or B001 onwards. Enter the Participant Identification Number at the top of every page.
- Printed paper CRFs may be used for later transfer of the data onto the electronic database.
- For participants who return for re-admission to the same site, **start a new form with a different Participant Identification Number**. Please check "YES-admitted previously to this facility" in the RE-ADMISSION section. Enter as 2 separate entries in the electronic database.
- For participants who transfer between two sites that are both collecting data on this form, it is preferred to have the data entered by a single site as a single admission, under the same Participant Identification Number. When this is not possible, the first site should record "Transfer to other facility" as an OUTCOME, and the second site should start a new form with a new patient number and indicate "YES-transferred from other facility" RE-ADMISSION.
- Complete every line of every section, except where the instructions say to skip a section based on a response.
- Selections with circles (●) are single selection answers (choose one answer only). Selections with square boxes (□) are multiple selection answers (choose as many answers as are applicable).
- Mark 'Not done' for any results of laboratory values that are not available, not applicable or unknown.
- Avoid recording data outside of the dedicated areas. Sections are available for recording additional information.
- If using paper CRFs, we recommend writing clearly in ink, using BLOCK-CAPITAL LETTERS.
- Place an (X) when you choose the corresponding answer. To make corrections, strike through (-----) the data you wish to delete and write the correct data above it. Please initial and date all corrections.
- Please keep all of the sheets for a single participant together e.g. with a staple or participant-unique folder.
- Please transfer all paper CRF data to the electronic database. All paper CRFs needs to be stored locally, do not send any forms to us. Data are accepted only via secure electronic database.
- Please enter data on the electronic data capture system at <https://ncov.medsci.ox.ac.uk/>. If your site would like to collect data independently, we are happy to support the establishment of locally hosted databases.
- Please contact us at [ncov@isaric.org](mailto:ncov@isaric.org) if you need help with databases, if you have comments and to let us know that you are using the forms.

## MODULE 1: PRESENTATION/ADMISSION CASE REPORT FORM

## CLINICAL INCLUSION CRITERIA

**Suspected or confirmed novel coronavirus (COVID-19) infection:** ☐ YES ☒ NO

### Is COVID-19 the reason for hospital admission?

☒ Yes, COVID-19 is the reason for hospital admission

☒ No, the patient is admitted to hospital for a reason other than COVID-19

## DEMOGRAPHICS

Clinical centre name: Country:

Enrolment date /first COVID-19 assessment date: [ D ][ D ]/[ M ][ M ]/[ 2 ][ 0 ][ Y ][ Y ]

**Ethnic group** (check all that apply): ☐ Arab ☐ Black ☐ East Asian ☐ South Asian ☐ West Asian ☐ Latin American ☐ White  
☐ Aboriginal/First Nations ☐ Other:  ☒ Unknown

**Employed as a Healthcare Worker?** ☒ YES ☐ NO ☐ Unknown **Employed in a microbiology laboratory?** ☒ YES ☐ NO ☐ Unknown

**Sex at Birth:** ☐ Male ☐ Female ☐ Not specified/Unknown **Age** [ ] [ ] [ ] years OR [ ] [ ] [ ] months

**Pregnant?** ☒ YES ☐ NO ☐ Unknown **If YES: Gestational weeks assessment:** [   ] [   ] weeks

## MODULE 1: PRESENTATION/ADMISSION CASE REPORT FORM

## ONSET & ADMISSION

Onset date of first/earliest symptom: [ D ][ D ]/[ M ][ M ]/[ 2 ][ 0 ][ Y ][ Y ]

Most recent presentation/admission date at this facility: [ D ][ D ]/[ M ][ M ]/[ 2 ][ 0 ][ Y ][ Y ]

**SIGNS AND SYMPTOMS AT HOSPITAL ADMISSION** (*first available data at presentation/admission – within 24 hours*)

**Temperature:** [     ][     ][     ].[     ] °C or °F

HR: [     ] [     ] beats/minute

RR: [ ] breaths/minute

**Systolic BP:** [   ] [   ] [   ] mmHg      **Diastolic BP:** [   ] [   ] [   ] mmHg

**Oxygen saturation:** [   ] [   ] [   ] % **On:** ☒ Room air ☐ Oxygen therapy ☐ Unknown

**Sternal capillary refill time >2sec.** ☐ YES ☐ NO ☐ Unknown **Height:** [ ] [ ] [ ] cm **Weight:** [ ] [ ] [ ] kg

### SIGNS AND SYMPTOMS ON ADMISSION (Unk = Unknown)

|                  |                                      |                          |                           |
|------------------|--------------------------------------|--------------------------|---------------------------|
| History of fever | <input checked="" type="radio"/> YES | <input type="radio"/> NO | <input type="radio"/> Unk |
|------------------|--------------------------------------|--------------------------|---------------------------|

|                   |                           |                          |                           |
|-------------------|---------------------------|--------------------------|---------------------------|
| Fatigue / Malaise | <input type="radio"/> YES | <input type="radio"/> NO | <input type="radio"/> Unk |
|-------------------|---------------------------|--------------------------|---------------------------|

Cough ☒ YES - non-productive ☐ YES - productive

|          |                           |                          |                           |
|----------|---------------------------|--------------------------|---------------------------|
| Anorexia | <input type="radio"/> YES | <input type="radio"/> NO | <input type="radio"/> Unk |
|----------|---------------------------|--------------------------|---------------------------|

☒ YES - with haemoptysis   ☐ NO   ☐ Unk

|                                 |                                                                                         |
|---------------------------------|-----------------------------------------------------------------------------------------|
| Altered consciousness/confusion | <input checked="" type="radio"/> YES <input type="radio"/> NO <input type="radio"/> Unk |
|---------------------------------|-----------------------------------------------------------------------------------------|

|             |                                      |                          |                           |
|-------------|--------------------------------------|--------------------------|---------------------------|
| Sore throat | <input checked="" type="radio"/> YES | <input type="radio"/> NO | <input type="radio"/> Unk |
|-------------|--------------------------------------|--------------------------|---------------------------|

|                        |                                      |                          |                           |
|------------------------|--------------------------------------|--------------------------|---------------------------|
| Muscle aches (myalgia) | <input checked="" type="radio"/> YES | <input type="radio"/> NO | <input type="radio"/> Unk |
|------------------------|--------------------------------------|--------------------------|---------------------------|

|                          |                                      |                          |                           |
|--------------------------|--------------------------------------|--------------------------|---------------------------|
| Runny nose (rhinorrhoea) | <input checked="" type="radio"/> YES | <input type="radio"/> NO | <input type="radio"/> Unk |
|--------------------------|--------------------------------------|--------------------------|---------------------------|

|                         |                                      |                          |                           |
|-------------------------|--------------------------------------|--------------------------|---------------------------|
| Joint pain (arthralgia) | <input checked="" type="radio"/> YES | <input type="radio"/> NO | <input type="radio"/> Unk |
|-------------------------|--------------------------------------|--------------------------|---------------------------|

|                            |                                                                              |                          |                                                                              |
|----------------------------|------------------------------------------------------------------------------|--------------------------|------------------------------------------------------------------------------|
| Wheezing                   | <input type="radio"/> YES <input type="radio"/> NO <input type="radio"/> Unk | Inability to walk        | <input type="radio"/> YES <input type="radio"/> NO <input type="radio"/> Unk |
| Shortness of breath        | <input type="radio"/> YES <input type="radio"/> NO <input type="radio"/> Unk | Abdominal pain           | <input type="radio"/> YES <input type="radio"/> NO <input type="radio"/> Unk |
| Lower chest wall indrawing | <input type="radio"/> YES <input type="radio"/> NO <input type="radio"/> Unk | Diarrhoea                | <input type="radio"/> YES <input type="radio"/> NO <input type="radio"/> Unk |
| Chest pain                 | <input type="radio"/> YES <input type="radio"/> NO <input type="radio"/> Unk | Vomiting / Nausea        | <input type="radio"/> YES <input type="radio"/> NO <input type="radio"/> Unk |
| Conjunctivitis             | <input type="radio"/> YES <input type="radio"/> NO <input type="radio"/> Unk | Skin rash                | <input type="radio"/> YES <input type="radio"/> NO <input type="radio"/> Unk |
| Lymphadenopathy            | <input type="radio"/> YES <input type="radio"/> NO <input type="radio"/> Unk | Bleeding (Haemorrhage)   | <input type="radio"/> YES <input type="radio"/> NO <input type="radio"/> Unk |
| Headache                   | <input type="radio"/> YES <input type="radio"/> NO <input type="radio"/> Unk | If YES, specify site(s): |                                                                              |
| Loss of smell (Anosmia)    | <input type="radio"/> YES <input type="radio"/> NO <input type="radio"/> Unk | Other symptom(s)         | <input type="radio"/> YES <input type="radio"/> NO <input type="radio"/> Unk |
| Loss of taste (Ageusia)    | <input type="radio"/> YES <input type="radio"/> NO <input type="radio"/> Unk | If YES, specify:         |                                                                              |
| Seizures                   | <input type="radio"/> YES <input type="radio"/> NO <input type="radio"/> Unk |                          |                                                                              |

## MODULE 1: PRESENTATION/ADMISSION CASE REPORT FORM

| PRE-ADMISSION MEDICATION (taken within 14 days prior to admission/presentation at healthcare facility) |                                                                              |                                                                                                                                                                              |                                                                              |
|--------------------------------------------------------------------------------------------------------|------------------------------------------------------------------------------|------------------------------------------------------------------------------------------------------------------------------------------------------------------------------|------------------------------------------------------------------------------|
| Steroids                                                                                               | <input type="radio"/> YES <input type="radio"/> NO <input type="radio"/> Unk | If YES, <input type="radio"/> Oral <input type="radio"/> Inhaled <input type="radio"/> Unk                                                                                   |                                                                              |
| Other immunosuppressant agents (not oral steroids)                                                     | <input type="radio"/> YES <input type="radio"/> NO <input type="radio"/> Unk |                                                                                                                                                                              |                                                                              |
| Antibiotics                                                                                            | <input type="radio"/> YES <input type="radio"/> NO <input type="radio"/> Unk | If YES, agent(s):                                                                                                                                                            |                                                                              |
| Antivirals                                                                                             | <input type="radio"/> YES <input type="radio"/> NO <input type="radio"/> Unk | If YES, agent(s):                                                                                                                                                            |                                                                              |
| Other targeted COVID-19 Medications                                                                    | <input type="radio"/> YES <input type="radio"/> NO <input type="radio"/> Unk | If YES, agent(s):                                                                                                                                                            |                                                                              |
| CO-MORBIDITIES AND RISK FACTORS (existing prior to admission and ongoing)                              |                                                                              |                                                                                                                                                                              |                                                                              |
| Chronic cardiac disease (not hypertension)                                                             | <input type="radio"/> YES <input type="radio"/> NO <input type="radio"/> Unk | Chronic hematologic disease                                                                                                                                                  | <input type="radio"/> YES <input type="radio"/> NO <input type="radio"/> Unk |
| Hypertension                                                                                           | <input type="radio"/> YES <input type="radio"/> NO <input type="radio"/> Unk | AIDS / HIV <input type="radio"/> YES-on ART <input type="radio"/> YES-not on ART <input type="radio"/> NO <input type="radio"/> Unk                                          |                                                                              |
|                                                                                                        |                                                                              | If YES, most recent CD4 count:                                                                                                                                               |                                                                              |
|                                                                                                        |                                                                              | <input type="radio"/> < 200 <input type="radio"/> 200-< 500 <input type="radio"/> ≥ 500 cells/uL <input type="radio"/> Unk                                                   |                                                                              |
| Chronic pulmonary disease (not asthma)                                                                 | <input type="radio"/> YES <input type="radio"/> NO <input type="radio"/> Unk | Diabetes Mellitus <input type="radio"/> YES-Type 1 <input type="radio"/> YES-Type 2 <input type="radio"/> YES-Gestational <input type="radio"/> NO <input type="radio"/> Unk |                                                                              |
|                                                                                                        |                                                                              | If YES, HbA1C results (within last 6 months):                                                                                                                                |                                                                              |
|                                                                                                        |                                                                              | Units: <input type="radio"/> mmol/mol <input type="radio"/> mmol/L <input type="radio"/> %                                                                                   |                                                                              |
| Asthma (physician diagnosed)                                                                           | <input type="radio"/> YES <input type="radio"/> NO <input type="radio"/> Unk | Rheumatologic disorder                                                                                                                                                       | <input type="radio"/> YES <input type="radio"/> NO <input type="radio"/> Unk |
| Chronic kidney disease                                                                                 | <input type="radio"/> YES <input type="radio"/> NO <input type="radio"/> Unk | Dementia                                                                                                                                                                     | <input type="radio"/> YES <input type="radio"/> NO <input type="radio"/> Unk |
| Obesity (as defined by clinical staff)                                                                 | <input type="radio"/> YES <input type="radio"/> NO <input type="radio"/> Unk | Tuberculosis                                                                                                                                                                 | <input type="radio"/> YES <input type="radio"/> NO <input type="radio"/> Unk |
| Moderate or severe liver disease                                                                       | <input type="radio"/> YES <input type="radio"/> NO <input type="radio"/> Unk | Malnutrition                                                                                                                                                                 | <input type="radio"/> YES <input type="radio"/> NO <input type="radio"/> Unk |
| Mild liver disease                                                                                     | <input type="radio"/> YES <input type="radio"/> NO <input type="radio"/> Unk | Smoking <input type="radio"/> YES <input type="radio"/> Never smoked <input type="radio"/> Former smoker <input type="radio"/> Unk                                           |                                                                              |
| Asplenia                                                                                               | <input type="radio"/> YES <input type="radio"/> NO <input type="radio"/> Unk | Other relevant risk factor(s)                                                                                                                                                | <input type="radio"/> YES <input type="radio"/> NO <input type="radio"/> Unk |
| Chronic neurological disorder                                                                          | <input type="radio"/> YES <input type="radio"/> NO <input type="radio"/> Unk | If YES, specify:                                                                                                                                                             |                                                                              |
| Malignant neoplasm                                                                                     | <input type="radio"/> YES <input type="radio"/> NO <input type="radio"/> Unk |                                                                                                                                                                              |                                                                              |

## MODULE 2: CASE REPORT FORM ON ADMISSION, CRITICAL CARE, RESEARCH SAMPLING

Complete on the day of admission or first COVID-19 investigation, and on the first day of ICU admission (if different from day of admission). In addition, complete for days when biochemical results are available.

**SIGNS AND SYMPTOMS** (Record the worst value between 00:00 to 24:00 on day of assessment)(worst=furthest from normal range)

DATE OF ASSESSMENT (DD/MM/YYYY): [D][D]/[M][M]/[Y2][Y][Y]

Highest temperature: [ ][ ][ ][ ] °C or [ ][ ][ ] °F    HR: [ ][ ][ ] beats/minute    RR: [ ][ ][ ] breaths/minute

Systolic BP: [ ][ ][ ] mmHg    Diastolic BP: [ ][ ][ ] mmHg

Oxygen saturation SaO<sub>2</sub> [ ][ ][ ] %

Any supplemental oxygen: ☐ YES ☐ NO ☐ Unknown If yes,

FiO<sub>2</sub> (0.21-1.0) [ ][ ][ ] or [ ][ ][ ] % or [ ][ ][ ] L/min (Highest L/min)

PaO<sub>2</sub> (at time nearest to the FiO<sub>2</sub> recorded at top of page) [ ][ ][ ] kPa or [ ][ ][ ] mmHg ☐ Not done

PaO<sub>2</sub> sample type: ☐ Arterial ☐ Capillary ☐ Venous ☐ Unknown

From same blood gas record as PaO<sub>2</sub>:

PCO<sub>2</sub> [ ][ ][ ] kPa or [ ][ ][ ] mmHg | pH [ ][ ][ ] | HCO<sub>3</sub><sup>-</sup> [ ][ ][ ] mEq/L | Base excess [ ][ ][ ] mmol/L

Sternal capillary refill time >2seconds ☐ YES ☐ NO ☐ Unknown

AVPU: Alert [ ][ ][ ] Verbal [ ][ ][ ] Pain [ ][ ][ ] Unresponsive [ ][ ][ ]    Glasgow Coma Score (GCS / 15) [ ][ ][ ]

Richmond Agitation-Sedation Scale (RASS) [ ][ ][ ]

Mean Arterial Blood Pressure [ ][ ][ ][ ] mmHg ☐ Unknown

Urine flow rate [ ][ ][ ][ ][ ][ ] mL/24 hours ☐ Check if estimated ☐ Unknown

**Is the patient currently receiving, or has received (between 00:00 to 24:00 on day of assessment)**

Current admission to ICU/ITU/IMC/HDU? ☐ YES ☐ NO ☐ Unknown

High-flow nasal cannula oxygen therapy? ☐ YES ☐ NO ☐ Unknown

Non-invasive ventilation (Any)? ☐ YES ☐ NO ☐ Unknown If YES: ☐ BIPAP ☐ CPAP ☐ Other ☐ Unknown

Invasive ventilation? ☐ YES ☐ NO ☐ Unknown

Prone positioning? ☐ YES ☐ NO ☐ Unknown If yes, ☐ during invasive ventilation ☐ whilst self-ventilating ☐ Unknown

Inhaled Nitric Oxide? ☐ YES ☐ NO ☐ Unknown

Tracheostomy inserted? ☐ YES ☐ NO ☐ Unknown

Extra corporeal life support (ECLS/ ECMO)? ☐ YES ☐ NO ☐ Unknown If YES: ☐ OV ☐ AV ☐ Central ☐ Unknown

Renal replacement therapy (RRT) or dialysis? ☐ YES ☐ NO ☐ Unknown

Any vasopressor/inotropic support? ☐ YES ☐ NO ☐ Unknown (if NO, select NO for the next 3 questions)

Dopamine <5µg/kg/min OR Dobutamine OR milrinone OR levosimendan: ☐ YES ☐ NO

Dopamine 5-15µg/kg/min OR Epinephrine/Norepinephrine < 0.1µg/kg/min OR vasopressin OR phenylephrine: ☐ YES ☐ NO

Dopamine >15µg/kg/min OR Epinephrine/Norepinephrine > 0.1µg/kg/min: ☐ YES ☐ NO

Neuromuscular blocking agents? ☐ YES ☐ NO ☐ Unknown

Other intervention(s) or procedure(s)? ☐ YES ☐ NO ☐ Unknown If YES, Specify: \_\_\_\_\_

## MODULE 2: CASE REPORT FORM ON ADMISSION, CRITICAL CARE, RESEARCH SAMPLING

Complete on the day of admission or first COVID-19 investigation, and on the first day of ICU admission (if different from day of admission). In addition, complete for days when biochemical results are available.

| LABORATORY RESULTS (on admission, on any admission to ICU, then daily) – complete every line      |        |                       |                       |        |                       |
|---------------------------------------------------------------------------------------------------|--------|-----------------------|-----------------------|--------|-----------------------|
| DATE OF ASSESSMENT (DD/MM/YYYY): [ D ][ D ]/[ M ][ M ]/[ 2 ][ 0 ][ Y ][ Y ]                       |        |                       |                       |        |                       |
| LABORATORY RESULTS (*record units if different from those listed)                                 |        |                       |                       |        |                       |
| Record the worst value between 00:00 to 24:00 on day of assessment (if Not Available write 'N/A') |        |                       |                       |        |                       |
| Parameter                                                                                         | Value* | Not done              | Parameter             | Value* | Not done              |
| Haemoglobin (g/L)                                                                                 |        | <input type="radio"/> | Urea (BUN) (mmol/L)   |        | <input type="radio"/> |
| WBC count (x10 <sup>9</sup> /L)                                                                   |        | <input type="radio"/> | Lactate (mmol/L)      |        | <input type="radio"/> |
| Lymphocyte count (10 <sup>9</sup> /L)                                                             |        | <input type="radio"/> | Creatinine (μmol/L)   |        | <input type="radio"/> |
| Neutrophil count (10 <sup>9</sup> /L)                                                             |        | <input type="radio"/> | Sodium (mmol/L)       |        | <input type="radio"/> |
| Haematocrit (%)                                                                                   |        | <input type="radio"/> | Potassium (mmol/L)    |        | <input type="radio"/> |
| Platelets (x10 <sup>9</sup> /L)                                                                   |        | <input type="radio"/> | Procalcitonin (ng/mL) |        | <input type="radio"/> |
| APTT (seconds)                                                                                    |        | <input type="radio"/> | CRP (mg/L)            |        | <input type="radio"/> |
| APTR                                                                                              |        | <input type="radio"/> | LDH (U/L)             |        | <input type="radio"/> |
| PT (seconds)                                                                                      |        | <input type="radio"/> | Creatine kinase (U/L) |        | <input type="radio"/> |
| INR                                                                                               |        | <input type="radio"/> | Troponin I (ng/mL)    |        | <input type="radio"/> |
| ALT/SGPT (U/L)                                                                                    |        | <input type="radio"/> | D-dimer (mg/L)        |        | <input type="radio"/> |
| Total bilirubin (μmol/L)                                                                          |        | <input type="radio"/> | Ferritin (ng/mL)      |        | <input type="radio"/> |
| AST/SGOT (U/L)                                                                                    |        | <input type="radio"/> | IL-6 (pg/mL)          |        | <input type="radio"/> |
| Glucose (mmol/L)                                                                                  |        | <input type="radio"/> | Fibrinogen (mg/dl)    |        | <input type="radio"/> |

## MODULE 3: OUTCOME CASE REPORT FORM

| TREATMENT: At ANY time during hospitalisation, did the patient receive/undergo:                                                                                                                       |                                                                  |
|-------------------------------------------------------------------------------------------------------------------------------------------------------------------------------------------------------|------------------------------------------------------------------|
| Any Oxygen therapy? <input type="radio"/> YES <input type="radio"/> NO <input type="radio"/> Unknown                                                                                                  | If YES, total duration: _____ days <input type="radio"/> Unknown |
| Maximum O <sub>2</sub> flow volume: <input type="radio"/> <2 L/min <input type="radio"/> 2-5 L/min <input type="radio"/> 6-10 L/min <input type="radio"/> 11-15 L/min <input type="radio"/> >15 L/min |                                                                  |
| Non-invasive ventilation? (Any) <input type="radio"/> YES <input type="radio"/> NO <input type="radio"/> Unknown                                                                                      | If YES, total duration: _____ days <input type="radio"/> Unknown |
| Invasive ventilation? (Any) <input type="radio"/> YES <input type="radio"/> NO <input type="radio"/> Unknown                                                                                          | If YES, total duration: _____ days <input type="radio"/> Unknown |
| High flow nasal oxygen <input type="radio"/> YES <input type="radio"/> NO <input type="radio"/> Unknown                                                                                               | If YES, total duration: _____ days <input type="radio"/> Unknown |
| Prone Positioning? <input type="radio"/> YES <input type="radio"/> NO <input type="radio"/> Unknown                                                                                                   |                                                                  |
| Inhaled Nitric Oxide? <input type="radio"/> YES <input type="radio"/> NO <input type="radio"/> Unknown                                                                                                |                                                                  |
| Tracheostomy inserted? <input type="radio"/> YES <input type="radio"/> NO <input type="radio"/> Unknown                                                                                               |                                                                  |
| Extracorporeal support (ECMO)? <input type="radio"/> YES <input type="radio"/> NO <input type="radio"/> Unknown                                                                                       | If YES, total duration: _____ days <input type="radio"/> Unknown |
| Renal replacement therapy (RRT) or dialysis? <input type="radio"/> YES <input type="radio"/> NO <input type="radio"/> Unknown                                                                         |                                                                  |
| Inotropes/vasopressors? <input type="radio"/> YES <input type="radio"/> NO <input type="radio"/> Unknown                                                                                              |                                                                  |
| ICU or High Dependency Unit admission? <input type="radio"/> YES <input type="radio"/> NO <input type="radio"/> Unknown                                                                               | If YES, total duration: _____ days <input type="radio"/> Unknown |
| If YES, date of ICU admission: [ D ][ D ]/[ M ][ M ]/[ 2 ][ 0 ][ Y ][ Y ] <input type="radio"/> Unknown                                                                                               |                                                                  |
| date of ICU discharge: [ D ][ D ]/[ M ][ M ]/[ 2 ][ 0 ][ Y ][ Y ] <input type="radio"/> Unknown                                                                                                       |                                                                  |

### MODULE 3: OUTCOME CASE REPORT FORM

| COMPLICATIONS: At any time during hospitalisation did the patient experience: (Unk = Unknown) |                                                                              |                                         |                                                                              |
|-----------------------------------------------------------------------------------------------|------------------------------------------------------------------------------|-----------------------------------------|------------------------------------------------------------------------------|
| Viral pneumonia/pneumonitis                                                                   | <input type="radio"/> YES <input type="radio"/> NO <input type="radio"/> Unk | Meningitis / Encephalitis               | <input type="radio"/> YES <input type="radio"/> NO <input type="radio"/> Unk |
| Bacterial pneumonia                                                                           | <input type="radio"/> YES <input type="radio"/> NO <input type="radio"/> Unk | Bacteremia                              | <input type="radio"/> YES <input type="radio"/> NO <input type="radio"/> Unk |
| Acute Respiratory Distress Syndrome                                                           | <input type="radio"/> YES <input type="radio"/> NO <input type="radio"/> Unk | Coagulation disorder / DIC              | <input type="radio"/> YES <input type="radio"/> NO <input type="radio"/> Unk |
| Pneumothorax                                                                                  | <input type="radio"/> YES <input type="radio"/> NO <input type="radio"/> Unk | Pulmonary Embolism                      | <input type="radio"/> YES <input type="radio"/> NO <input type="radio"/> Unk |
| Pleural effusion                                                                              | <input type="radio"/> YES <input type="radio"/> NO <input type="radio"/> Unk | Deep Vein Thrombosis                    | <input type="radio"/> YES <input type="radio"/> NO <input type="radio"/> Unk |
| Cryptogenic organizing pneumonia (COP)                                                        | <input type="radio"/> YES <input type="radio"/> NO <input type="radio"/> Unk | Other thromboembolism (not PE or DVT)   | <input type="radio"/> YES <input type="radio"/> NO <input type="radio"/> Unk |
| Bronchiolitis                                                                                 | <input type="radio"/> YES <input type="radio"/> NO <input type="radio"/> Unk | Anemia                                  | <input type="radio"/> YES <input type="radio"/> NO <input type="radio"/> Unk |
| Cardiac arrest                                                                                | <input type="radio"/> YES <input type="radio"/> NO <input type="radio"/> Unk | Rhabdomyolysis / Myositis               | <input type="radio"/> YES <input type="radio"/> NO <input type="radio"/> Unk |
| Myocardial infarction                                                                         | <input type="radio"/> YES <input type="radio"/> NO <input type="radio"/> Unk | Acute renal injury/ Acute renal failure | <input type="radio"/> YES <input type="radio"/> NO <input type="radio"/> Unk |
| Cardiac ischaemia                                                                             | <input type="radio"/> YES <input type="radio"/> NO <input type="radio"/> Unk | Gastrointestinal haemorrhage            | <input type="radio"/> YES <input type="radio"/> NO <input type="radio"/> Unk |
| Cardiac arrhythmia                                                                            | <input type="radio"/> YES <input type="radio"/> NO <input type="radio"/> Unk | Pancreatitis                            | <input type="radio"/> YES <input type="radio"/> NO <input type="radio"/> Unk |
| Myocarditis / Pericarditis                                                                    | <input type="radio"/> YES <input type="radio"/> NO <input type="radio"/> Unk | Liver dysfunction                       | <input type="radio"/> YES <input type="radio"/> NO <input type="radio"/> Unk |
| Endocarditis                                                                                  | <input type="radio"/> YES <input type="radio"/> NO <input type="radio"/> Unk | Hyperglycemia                           | <input type="radio"/> YES <input type="radio"/> NO <input type="radio"/> Unk |
| Cardiomyopathy                                                                                | <input type="radio"/> YES <input type="radio"/> NO <input type="radio"/> Unk | Hypoglycemia                            | <input type="radio"/> YES <input type="radio"/> NO <input type="radio"/> Unk |
| Congestive heart failure                                                                      | <input type="radio"/> YES <input type="radio"/> NO <input type="radio"/> Unk | Other                                   | <input type="radio"/> YES <input type="radio"/> NO <input type="radio"/> Unk |
| Seizure                                                                                       | <input type="radio"/> YES <input type="radio"/> NO <input type="radio"/> Unk | If YES, specify: _____                  |                                                                              |
| Stroke / Cerebrovascular accident                                                             | <input type="radio"/> YES <input type="radio"/> NO <input type="radio"/> Unk |                                         |                                                                              |

| DIAGNOSTICS                                                                                                                                                                                                                                                     |                                                                                                                                                                                                     |
|-----------------------------------------------------------------------------------------------------------------------------------------------------------------------------------------------------------------------------------------------------------------|-----------------------------------------------------------------------------------------------------------------------------------------------------------------------------------------------------|
| Section 1: RESPIRATORY VIRUS PCR TESTING                                                                                                                                                                                                                        |                                                                                                                                                                                                     |
| SARS-CoV-2 (COVID-19): <input type="radio"/> Positive <input type="radio"/> Negative <input type="radio"/> Not done <input type="radio"/> Unknown                                                                                                               |                                                                                                                                                                                                     |
| Was other pathogen testing done during this illness episode? <input type="radio"/> YES (complete section) <input type="radio"/> NO <input type="radio"/> Unknown                                                                                                |                                                                                                                                                                                                     |
| Influenza : <input type="radio"/> Positive <input type="radio"/> Negative <input type="radio"/> Not done <input type="radio"/> Unknown                                                                                                                          |                                                                                                                                                                                                     |
| If Positive: <input type="radio"/> A-not typed <input type="radio"/> A/H3N2 <input type="radio"/> A/H1N1pdm09 <input type="radio"/> A/H7N9 <input type="radio"/> A/H5N1 <input type="radio"/> B <input type="radio"/> Other: _____ .. <input type="radio"/> Unk |                                                                                                                                                                                                     |
| Respiratory Syncytial Virus (RSV): <input type="radio"/> Positive <input type="radio"/> Negative <input type="radio"/> Not done <input type="radio"/> Unknown                                                                                                   |                                                                                                                                                                                                     |
| Adenovirus: <input type="radio"/> Positive <input type="radio"/> Negative <input type="radio"/> Not done <input type="radio"/> Unknown                                                                                                                          |                                                                                                                                                                                                     |
| Section 2: BACTERIAL TESTING                                                                                                                                                                                                                                    |                                                                                                                                                                                                     |
| Bacteria: <input type="radio"/> Positive <input type="radio"/> Negative <input type="radio"/> Not done If Positive, specify: _____ <input type="radio"/> Unknown                                                                                                |                                                                                                                                                                                                     |
| Other pathogen/s detected: <input type="radio"/> YES <input type="radio"/> NO <input type="radio"/> Unknown If YES, specify all: _____ <input type="radio"/> Unknown                                                                                            |                                                                                                                                                                                                     |
| Section 3: RADIOLOGY                                                                                                                                                                                                                                            |                                                                                                                                                                                                     |
| Clinical pneumonia diagnosed? <input type="radio"/> YES <input type="radio"/> NO <input type="radio"/> Unknown                                                                                                                                                  |                                                                                                                                                                                                     |
| Chest X-Ray performed?                                                                                                                                                                                                                                          | <input type="radio"/> YES <input type="radio"/> NO <input type="radio"/> Unknown If Yes: Were infiltrates present? <input type="radio"/> YES <input type="radio"/> NO <input type="radio"/> Unknown |
| CT performed?                                                                                                                                                                                                                                                   | <input type="radio"/> YES <input type="radio"/> NO <input type="radio"/> Unknown If Yes: Were infiltrates present? <input type="radio"/> YES <input type="radio"/> NO <input type="radio"/> Unknown |



## MODULE 3: OUTCOME CASE REPORT FORM

| DIAGNOSTICS <i>continued</i>                                                                                                                                                                                                                                                                                                                                               |                                                                                                                                                                                                                                                                                                                                                                                                                                                                                                               |                                                                                                                                                               |                                                                                                                                                  |                                   |
|----------------------------------------------------------------------------------------------------------------------------------------------------------------------------------------------------------------------------------------------------------------------------------------------------------------------------------------------------------------------------|---------------------------------------------------------------------------------------------------------------------------------------------------------------------------------------------------------------------------------------------------------------------------------------------------------------------------------------------------------------------------------------------------------------------------------------------------------------------------------------------------------------|---------------------------------------------------------------------------------------------------------------------------------------------------------------|--------------------------------------------------------------------------------------------------------------------------------------------------|-----------------------------------|
| Section 4: PATHOGEN TESTING DETAILS                                                                                                                                                                                                                                                                                                                                        |                                                                                                                                                                                                                                                                                                                                                                                                                                                                                                               |                                                                                                                                                               |                                                                                                                                                  |                                   |
| Collection Date<br>(DD/MM/YYYY)                                                                                                                                                                                                                                                                                                                                            | Biospecimen Type                                                                                                                                                                                                                                                                                                                                                                                                                                                                                              | Laboratory test<br>Method                                                                                                                                     | Result                                                                                                                                           | Pathogen<br>Tested/Detected       |
| <div><div><div><div><div></div><div>D</div></div><div><div></div><div>D</div></div></div><div><div></div><div>/</div></div><div><div><div></div><div>M</div></div><div><div></div><div>M</div></div></div><div><div></div><div>/</div></div><div><div><div></div><div>20</div></div><div><div></div><div>Y</div></div><div><div></div><div>Y</div></div></div></div></div> | <div><div><div><div><div></div><div>Nasal/NP swab</div></div><div><div></div><div>Throat swab</div></div></div><div><div></div><div>Combined nasal/NP+throat swab</div></div><div><div><div><div></div><div>Sputum</div></div><div><div></div><div>BAL</div></div><div><div></div><div>ETA</div></div><div><div></div><div>Urine</div></div></div><div><div></div><div>Feces/rectal swab</div></div><div><div></div><div>Blood</div></div><div><div></div><div>Other, Specify:</div></div></div></div></div>  | <div><div><div><div><div></div><div>PCR</div></div><div><div></div><div>Culture</div></div><div><div></div><div>Other, Specify:</div></div></div></div></div> | <div><div><div><div></div><div>Positive</div></div><div><div></div><div>Negative</div></div><div><div></div><div>Unknown</div></div></div></div> | <div><div></div><div></div></div> |
| <div><div><div><div><div></div><div>D</div></div><div><div></div><div>D</div></div></div><div><div></div><div>/</div></div><div><div><div></div><div>M</div></div><div><div></div><div>M</div></div></div><div><div></div><div>/</div></div><div><div><div></div><div>20</div></div><div><div></div><div>Y</div></div><div><div></div><div>Y</div></div></div></div></div> | <div><div><div><div><div></div><div>Nasal/NP swab</div></div><div><div></div><div>Throat swab</div></div></div><div><div></div><div>Combined nasal/NP+throat swab</div></div><div><div><div><div></div><div>Sputum</div></div><div><div></div><div>BAL</div></div><div><div></div><div>ETA</div></div><div><div></div><div>Urine</div></div></div><div><div></div><div>Feces/rectal swab</div></div><div><div></div><div>Blood</div></div><div><div></div><div>Other, Specify:</div></div></div></div></div>  | <div><div><div><div><div></div><div>PCR</div></div><div><div></div><div>Culture</div></div><div><div></div><div>Other, Specify:</div></div></div></div></div> | <div><div><div><div></div><div>Positive</div></div><div><div></div><div>Negative</div></div><div><div></div><div>Unknown</div></div></div></div> | <div><div></div><div></div></div> |
| <div><div><div><div><div></div><div>D</div></div><div><div></div><div>D</div></div></div><div><div></div><div>/</div></div><div><div><div></div><div>M</div></div><div><div></div><div>M</div></div></div><div><div></div><div>/</div></div><div><div><div></div><div>20</div></div><div><div></div><div>Y</div></div><div><div></div><div>Y</div></div></div></div></div> | <div><div><div><div><div></div><div>Nasal/NP swab</div></div><div><div></div><div>Throat swab</div></div></div><div><div></div><div>Combined nasal/NP+throat swab</div></div><div><div><div><div></div><div>Sputum</div></div><div><div></div><div>BAL</div></div><div><div></div><div>ETA</div></div><div><div></div><div>Urine</div></div></div><div><div></div><div>Feces/rectal swab</div></div><div><div></div><div>Blood</div></div><div><div></div><div>Other, Specify:</div></div></div></div></div>  | <div><div><div><div><div></div><div>PCR</div></div><div><div></div><div>Culture</div></div><div><div></div><div>Other, Specify:</div></div></div></div></div> | <div><div><div><div></div><div>Positive</div></div><div><div></div><div>Negative</div></div><div><div></div><div>Unknown</div></div></div></div> | <div><div></div><div></div></div> |
| <div><div><div><div><div></div><div>D</div></div><div><div></div><div>D</div></div></div><div><div></div><div>/</div></div><div><div><div></div><div>M</div></div><div><div></div><div>M</div></div></div><div><div></div><div>/</div></div><div><div><div></div><div>20</div></div><div><div></div><div>Y</div></div><div><div></div><div>Y</div></div></div></div></div> | <div><div><div><div><div></div><div>Nasal/NP swab</div></div><div><div></div><div>Throat swab</div></div></div><div><div></div><div>Combined nasal/NP+throat swab</div></div><div><div><div><div></div><div>Sputum</div></div><div><div></div><div>BAL</div></div><div><div></div><div>ETA</div></div><div><div></div><div>Urine</div></div></div><div><div></div><div>Faeces/rectal swab</div></div><div><div></div><div>Blood</div></div><div><div></div><div>Other, Specify:</div></div></div></div></div> | <div><div><div><div><div></div><div>PCR</div></div><div><div></div><div>Culture</div></div><div><div></div><div>Other, Specify:</div></div></div></div></div> | <div><div><div><div></div><div>Positive</div></div><div><div></div><div>Negative</div></div><div><div></div><div>Unknown</div></div></div></div> | <div><div></div><div></div></div> |

**MEDICATION:** While hospitalised or at discharge, were any of the following administered? (*Unk=Unknown*)

**ANTIVIRAL OR COVID-19 TARGETED AGENT?** ☐ YES ☐ NO ☐ Unknown If YES, specify (all) :

☐ Ribavirin Date commenced [ D ][ D ]/[ M ][ M ]/[ 2 ][ 0 ][ Y ][ Y ] ☐ Unk Duration: \_\_\_\_\_ days ☐ Unk

☐ Lopinavir/Ritonavir Date commenced [ D ][ D ]/[ M ][ M ]/[ 2 ][ 0 ][ Y ][ Y ] ☐ Unk Duration: \_\_\_\_\_ days ☐ Unk

☐ Remdesivir (Veklury) Date commenced [ D ][ D ]/[ M ][ M ]/[ 2 ][ 0 ][ Y ][ Y ] ☐ Unk Duration: \_\_\_\_\_ days ☐ Unk

☐ Interferon alpha Date commenced [ D ][ D ]/[ M ][ M ]/[ 2 ][ 0 ][ Y ][ Y ] ☐ Unk Duration: \_\_\_\_\_ days ☐ Unk

☐ Interferon beta Date commenced [ D ][ D ]/[ M ][ M ]/[ 2 ][ 0 ][ Y ][ Y ] ☐ Unk Duration: \_\_\_\_\_ days ☐ Unk

☐ Chloroquine/hydroxychloroquine:  
Date commenced [ D ][ D ]/[ M ][ M ]/[ 2 ][ 0 ][ Y ][ Y ] ☐ Unk... Duration: \_\_\_\_\_ days ☐ Unk

☐ Interleukin-6 (IL-6) inhibitor IF YES which: ☐ Tocilizumab ☐ Sarilumab ☐ Other IL-6 inhibitor \_\_\_\_\_ ☐ Unk  
Date commenced [ D ][ D ]/[ M ][ M ]/[ 2 ][ 0 ][ Y ][ Y ] ☐ Unk... Duration: \_\_\_\_\_ days ☐ Unk

☐ Convalescent plasma Date commenced [ D ][ D ]/[ M ][ M ]/[ 2 ][ 0 ][ Y ][ Y ] ☐ Unk Duration: \_\_\_\_\_ days ☐ Unk

☐ Anti-influenza anti-viral IF YES which: ☐ Oseltamivir (Tamiflu®) ☐ Zanamivir ☐ Unk  
Date commenced [ D ][ D ]/[ M ][ M ]/[ 2 ][ 0 ][ Y ][ Y ] ☐ Unk... Duration: \_\_\_\_\_ days ☐ Unk

☐ Other \_\_\_\_\_ Date commenced [ D ][ D ]/[ M ][ M ]/[ 2 ][ 0 ][ Y ][ Y ] ☐ Unk  
duration: \_\_\_\_\_ days ☐ Unk

## MODULE 3: OUTCOME CASE REPORT FORM

### MEDICATION (continued):

**ANTIBIOTIC?** ☐ YES ☐ NO ☐ Unknown If yes, specify all:

Agent 1: \_\_\_\_\_ Date commenced [ D ][ D ]/[ M ][ M ]/[ 2 ][ 0 ][ Y ][ Y ] Duration: \_\_\_\_\_ days ☐ Unk

Agent 2: \_\_\_\_\_ Date commenced [ D ][ D ]/[ M ][ M ]/[ 2 ][ 0 ][ Y ][ Y ] Duration: \_\_\_\_\_ days ☐ Unk

Agent 3: \_\_\_\_\_ Date commenced [ D ][ D ]/[ M ][ M ]/[ 2 ][ 0 ][ Y ][ Y ] Duration: \_\_\_\_\_ days ☐ Unk

**CORTICOSTEROID?** ☐ YES ☐ NO ☐ Unknown

If YES: Dexamethasone? ☐ YES ☐ NO ☐ Unknown

If YES, check all that apply:

☐ 6mg once per day (od)? ☐ YES ☐ NO ☐ Unknown If YES, Route: ☐ Oral ☐ Intravenous ☐ Unk

If YES, Date commenced [ D ][ D ]/[ M ][ M ]/[ 2 ][ 0 ][ Y ][ Y ] Duration: \_\_\_\_\_ days ☐ Unk

☐ other dose or frequency? ☐ YES ☐ NO ☐ Unknown If YES, Route: ☐ Oral ☐ Intravenous ☐ Unk

If YES, Date commenced [ D ][ D ]/[ M ][ M ]/[ 2 ][ 0 ][ Y ][ Y ] Duration: \_\_\_\_\_ days ☐ Unk

If YES: Other corticosteroid? ☐ YES ☐ NO ☐ Unknown

If YES: Which steroid: ☐ Prednisolone ☐ Hydrocortisone ☐ Methylprednisolone ☐ Other

Route: ☐ Oral ☐ Intravenous ☐ Unk

**ANTICOAGULATION?** ☐ YES ☐ NO ☐ Unk

If YES: Agent: \_\_\_\_\_

Route: ☐ Subcutaneous ☐ Intravenous (IV) ☐ Unk

Indication: ☐ therapeutic (treatment of DVT/PE) ☐ enhanced prophylaxis for COVID-19 ☐ routine inpatient prophylaxis ☐ Unk

**ANTIFUNGAL AGENT?** ☐ YES ☐ NO ☐ Unk

**OTHER treatments administered for COVID-19 including experimental or compassionate use?** ☐ YES ☐ NO ☐ Unk

If YES, specify agent and timing of administration:

Agent 1: \_\_\_\_\_

Date commenced [ D ][ D ]/[ M ][ M ]/[ 2 ][ 0 ][ Y ][ Y ] ☐ Unk Duration: \_\_\_\_\_ days ☐ Unk

Agent 2: \_\_\_\_\_

Date commenced [ D ][ D ]/[ M ][ M ]/[ 2 ][ 0 ][ Y ][ Y ] ☐ Unk Duration: \_\_\_\_\_ days ☐ Unk

Agent 3: \_\_\_\_\_

Date commenced [ D ][ D ]/[ M ][ M ]/[ 2 ][ 0 ][ Y ][ Y ] ☐ Unk Duration: \_\_\_\_\_ days ☐ Unk



## MODULE 3: OUTCOME CASE REPORT FORM

### OUTCOME

**Outcome:** ☐ Discharged alive ☐ Hospitalised ☐ Transfer to other facility ☐ Death ☐ Palliative discharge ☐ Unknown

**Outcome date:** [ D ][ D ]/[ M ][ M ]/[ 2 ][ 0 ][ Y ][ Y ] ☐ Unknown

If alive at outcome date:

**Ability to self-care at discharge versus before illness:** ☐ Same as before illness ☐ Worse ☐ Better ☐ Unknown

**Post-discharge treatment: Oxygen therapy?** ☐ YES ☐ NO ☐ Unknown

**Ongoing health care needs relating to this admission for COVID-19:** ☐ YES ☐ NO ☐ Unknown

**Ongoing health care needs NOT related to COVID episode:** ☐ YES ☐ NO ☐ Unknown

**Medically fit for discharge (COVID-19 resolved) but remains in hospital for other reason (e.g. awaiting suitable care in community, resident in long term health care or mental health facility):** ☐ YES ☐ NO ☐ Unknown

**POST PARTUM (within 6 weeks of delivery)?** ☐ YES ☐ NO ☐ Unknown (if NO or Unknown skip this section)

**Pregnancy Outcome:** ☐ Live birth ☐ Still birth **Delivery date:** [ ][ ][ ][ ][ ][ ]/[ ][ ][ ][ ][ ][ ]/[ ][ ][ ][ ][ ][ ]

**Baby tested for COVID-19/SARS-CoV-2 infection?** ☐ YES ☐ NO ☐ Unknown

**If YES, result of test:** ☐ Positive ☐ Negative ☐ Unknown (If Positive, complete a separate CRF for baby)

**INFANT – Less than 1 year old?** ☐ YES ☐ NO (If NO skip this section)

**Birth weight:** [ ][ ][ ][ ][ ][ ] kg or [ ][ ][ ][ ][ ][ ] lbs ☐ Unknown

**Gestational outcome:** ☐ Term birth (≥37wk GA) ☐ Preterm birth (<37wk GA) ☐ Unknown

**Breastfed?** ☐ YES-currently breastfeeding ☐ YES-breastfeeding discontinued ☐ NO ☐ Unknown

**Vaccinations appropriate for age/country?** ☐ YES ☐ NO ☐ Unknown

#### PREVIOUS COVID-19 INFECTIONS

**Has the patient had COVID-19 previously?**

☐ No ☐ Yes - once previously ☐ Yes - twice previously ☐ Yes - three times previously

(there is more space on the eCRF to capture this)

**First COVID-19 infection: When did their first COVID infection occur?** (MM/YYYY) \_\_\_\_\_

**Was their first COVID infection confirmed by testing:** ☐ Yes, confirmed by testing ☐ No, not confirmed by testing

**Were they admitted to hospital for their first infection of COVID?** ☐ Yes ☐ No

**Second COVID-19 infection: When did their second COVID infection occur?** (MM/YYYY) \_\_\_\_\_

**Was their second COVID infection confirmed by testing:** ☐ Yes, confirmed by testing ☐ No, not confirmed by testing

**Were they admitted to hospital for their second infection of COVID?** ☐ Yes ☐ No

If data on this patient was previously recorded in this study, record the Participant Identification Number (PIN) previously used in the section below

#### RE-ADMISSION AND PREVIOUS PIN

**Was the patient admitted previously or transferred from any other facility during this illness episode?**

☐ YES-admitted previously to this facility ☐ YES-transferred from other facility ☐ NO ☐ Unknown

**Number of previous admissions for this infection:** \_\_\_\_\_

**Has this patient's data been previously collected under a different patient number?** ☐ YES ☐ NO ☐ Unknown

**If YES, Participant Identification number (PIN):** \_\_\_\_\_

#### VACCINATIONS

**Covid-19 vaccination:** ☐ YES ☐ NO ☐ Unk

**Date of first vaccine :** [ ][ ][ ][ ][ ][ ]/[ ][ ][ ][ ][ ][ ]/[ ][ ][ ][ ][ ][ ] Date: ☐ actual ☐ estimated

**Type of first vaccine:** ☐ Pfizer/BioNTech | ☐ AstraZeneca Oxford (Covishield in India) | ☐ Moderna | ☐ Novavax  
☐ Janssens (Johnson & Johnson) | ☐ Sinopharm | ☐ Sinovac | ☐ Sputnik V | ☐ Covaxin | ☐ CanSinoBIO  
☐ Unknown | ☐ Other, please specify \_\_\_\_\_

**Date of second vaccine :** [ ][ ][ ][ ][ ][ ]/[ ][ ][ ][ ][ ][ ]/[ ][ ][ ][ ][ ][ ] Date: ☐ actual ☐ estimated

**Type of second vaccine:** ☐ Pfizer/BioNTech | ☐ AstraZeneca/University of Oxford (Covishield in India) | ☐ Moderna | ☐ Novavax  
☐ Janssens (Johnson & Johnson) | ☐ Sinopharm | ☐ Sinovac | ☐ Sputnik V | ☐ Covaxin | ☐ CanSinoBIO  
☐ Unknown | ☐ Other, please specify \_\_\_\_\_

**Date of third vaccine :** [ ][ ][ ][ ][ ][ ]/[ ][ ][ ][ ][ ][ ]/[ ][ ][ ][ ][ ][ ] Date: ☐ actual ☐ estimated

**Type of third vaccine:** ☐ Pfizer/BioNTech | ☐ AstraZeneca/University of Oxford (Covishield in India) | ☐ Moderna | ☐ Novavax  
☐ Janssens (Johnson & Johnson) | ☐ Sinopharm | ☐ Sinovac | ☐ Sputnik V | ☐ Covaxin | ☐ CanSinoBIO  
☐ Unknown | ☐ Other, please specify \_\_\_\_\_

**Influenza vaccination within the last 6 months:** ☒YES ☐NO ☐Unknown

Date of influenza vaccine :[\_D][\_D]/[\_M][\_M]/[\_2][\_0][\_Y][\_Y]    Date: ☒actual   ☐estimated

**Was patient diagnosed with Covid-19? ☐YES ☐NO ☐Unknown**

If yes, was the diagnosis based on: ☐ laboratory confirmation ☐ clinical assessment

**Is the patient infected with a variant of concern (VOC)?**

- Unknown
- No: Variant is known and no VOC identified
- Yes: Delta - B.1.617.2, identified Oct 2020
- Yes: Omicron, B.1.1.529, identified Nov 2021
- Yes: Alpha - B.1.1.7, identified in UK Sept 2020
- Yes: Beta - B.1.351, identified in South Africa May 2020
- Yes: Gamma - P.1, identified in Brazil Nov 2020
- Yes: Epsilon - B.1.427/B.1.429, identified in USA Mar 2021
- Yes: Zeta - P.2, identified in Brazil Apr 2020
- Yes: Eta - B.1.525, identified in Multiple Countries Dec 2020
- Yes: Theta - P.3, identified in Philippines Jan 2021
- Yes: Iota - B.1.526, identified in USA Nov 2020
- Yes: Kappa - B.1.617.1, identified in India Oct 2020
- Yes: Lambda - C.37, identified in Peru Dec 2020
- Yes: Mu - B.1.621, identified in Colombia Jan 2021
- Yes: A variant not listed above

Please check the REDCAP database for variants not listed above. New variants will be added to the database as they are identified.

**If the Omicron variant was identified, what method was used to identify it?**

- Genomic sequencing   ● S-gene target failure (SGTF) testing   ● PCR genotyping   ● Unknown or untested
